# Supplementary material for: PivNG primers and probes set used in the cobas omni Utility Channel is a reliable supplemental test for detection ofNeisseria gonorrhoeaein oropharyngeal, urogenital and rectal specimens collected in cobas PCR Media
Source: HighWire-hosted journal article supplement (doi:10.1136/sextrans-2022-055576), 2023-04-28
Supplement: sextrans-2022-055576supp001_data_supplement.pdf [file sextrans-2022-055576supp001_data_supplement.pdf]

## Supplementary Material

### **The PivNG primers and probes set used in the cobas omni Utility Channel is a reliable supplemental test for detection of *Neisseria gonorrhoeae* in oropharyngeal, urogenital and rectal specimens collected in cobas PCR Media**

Mark Hopkins, Rodney Arcenas, Xose Couto-Parada, Michael Lewinski, Merlin Njoya, Deva Perinpanathan, Rizwaan Sheriff, Avneet Hansra, Selena Singh

## Supplementary Methods

### **Composite reference standard analysis of subset of discordant and concordant NAAT NG results with available microscopy and/or culture results**

Given that microscopy and/or culture data were included for a randomised subset of samples with cobas<sup>®</sup> CT/NG and Xpert<sup>®</sup> CT/NG concordant and discordant NG results, the composite reference standard was partially verified. The randomised selection contained a total of 111 samples covering 59 discordant samples and a subset of concordant positive (36/269), concordant negative (5/40) and missing cobas/invalid Xpert (11/85) results. Of these, culture/microscopy results were available for 8 rectal (2 negative, 6 positive), 8 oropharyngeal (6 negative, 2 positive), 12 male urine (1 negative, 11 positive) and 6 vaginal (4 negative, 2 positive) samples. The Begg and Greenes' correction method<sup>1</sup> was used to calculate partial verification bias-adjusted estimates of PPA and NPA on the entire dataset (453 samples with valid PivNG results), with the assumption that the undetermined composite reference standard status was at random. Of this dataset, 6 samples were not evaluable (2 were missing both cobas CT/NG and Xpert CT/NG results and 4 had invalid Xpert CT/NG results) when determining the performance of PivNG compared with cobas CT/NG and Xpert CT/NG (Table 1; 447 samples).

### **Analytical performance**

Analytical sensitivity, defined as the lowest concentration where  $\geq 95\%$  of samples tested give positive results, was calculated using a probit curve fit to the lowest panel members. A panel per sample type with 25 replicates per level were tested in two specimen matrices over 5 days. Levels evaluated were 0.01, 0.03, 0.1, 0.3, 1 and 3 colony-forming units (CFUs)/mL for the swab matrix, and 0.005, 0.015, 0.05, 0.15, 0.5 and 1.5 CFUs/mL for the

urine matrix. Swab samples were collected in cobas PCR Media spiked with human colorectal carcinoma HCT-15 cells, and urine samples were collected in upper urinary tract matrix.

### **Limit of detection analysis of assays using a third-party control diluted in cobas PCR Media or molecular grade water**

Amplirun® Total CT/NG/TV/MGE control material (Vircell) was serially diluted using either cobas PCR Media or molecular grade water to six dilution points with nominal concentrations of 111, 36, 8, 4, 1, 0.1 copies/mL in each media, spanning the limit of detection of the Xpert CT/NG test. The panel of 12 samples (six concentrations in each media) were tested in triplicate using cobas CT/NG, PivNG and Xpert CT/NG assays and results compared.

### **Reference**

1. Arifin WN, Yusof UK. Correcting for partial verification bias in diagnostic accuracy studies: A tutorial using R. *Stat Med* 2022;41:1709–27.

**Supplementary Table S1. Frequency of available microscopy and culture NG results, with PivNG results stratified by concordant and discordant NG results from cobas CT/NG and Xpert CT/NG**

| Specimen site             | cobas/Xpert NG results       | Microscopy and culture NG result | PivNG result | Frequency |
|---------------------------|------------------------------|----------------------------------|--------------|-----------|
| <b>Oropharyngeal swab</b> | Concordant negative          | Not available                    | NG negative  | 38        |
|                           | Concordant negative          | Not available                    | NG positive  | 2         |
|                           | Concordant positive          | Negative                         | NG positive  | 1         |
|                           | Concordant positive          | Not available                    | NG positive  | 72        |
|                           | Concordant positive          | Positive                         | NG positive  | 1         |
|                           | Discordant positive/negative | Negative                         | NG negative  | 1         |
|                           | Discordant positive/negative | Negative                         | NG positive  | 4         |
|                           | Discordant positive/negative | Not available                    | NG negative  | 26        |
|                           | Discordant positive/negative | Not available                    | NG positive  | 8         |
|                           | Discordant positive/negative | Positive                         | NG positive  | 1         |
|                           | Missing cobas/invalid Xpert  | Not available                    | NG negative  | 2         |
| <b>Vaginal swab</b>       | Concordant positive          | Negative                         | NG positive  | 2         |
|                           | Concordant positive          | Not available                    | NG positive  | 56        |
|                           | Concordant positive          | Positive                         | NG positive  | 2         |
|                           | Discordant positive/negative | Negative                         | NG negative  | 1         |
|                           | Discordant positive/negative | Negative                         | NG positive  | 1         |
|                           | Discordant positive/negative | Not available                    | NG negative  | 6         |
|                           | Discordant positive/negative | Not available                    | NG positive  | 1         |
|                           | Missing cobas/invalid Xpert  | Not available                    | NG negative  | 31        |
| <b>Male urine sample</b>  | Concordant positive          | Not available                    | NG positive  | 45        |
|                           | Concordant positive          | Positive                         | NG positive  | 11        |
|                           | Discordant positive/negative | Negative                         | NG negative  | 1         |

|                    |                              |               |             |    |
|--------------------|------------------------------|---------------|-------------|----|
|                    | Discordant positive/negative | Not available | NG negative | 1  |
|                    | Discordant positive/negative | Not available | NG positive | 1  |
|                    | Missing cobas/invalid Xpert  | Not available | NG negative | 25 |
| <b>Rectal swab</b> | Concordant positive          | Not available | NG positive | 73 |
|                    | Concordant positive          | Positive      | NG positive | 6  |
|                    | Discordant positive/negative | Negative      | NG negative | 1  |
|                    | Discordant positive/negative | Negative      | NG positive | 1  |
|                    | Discordant positive/negative | Not available | NG negative | 3  |
|                    | Discordant positive/negative | Not available | NG positive | 2  |
|                    | Missing cobas/invalid Xpert  | Not available | NG negative | 26 |
|                    | Missing cobas/invalid Xpert  | Not available | NG positive | 1  |

---

CT, *Chlamydia trachomatis*; NG, *Neisseria gonorrhoeae*; Piv, pilin inversion

**Supplementary Table S2. PivNG PPA and NPA with a composite reference standard adjusted for partial verification bias using Begg and Greenes' method**

| Specimen site             | PivNG    | Composite reference standard<br>(cobas and Xpert and culture) |          |              |       | PPA<br>(95% CI)      | NPA<br>(95% CI)        |
|---------------------------|----------|---------------------------------------------------------------|----------|--------------|-------|----------------------|------------------------|
|                           |          | Positive                                                      | Negative | Undetermined | Total |                      |                        |
| <b>Oropharyngeal swab</b> | Positive | 75                                                            | 6        | 8            | 89    | 100% (99.96, 100.00) | 91.04% (84.25, 97.83)  |
|                           | Negative | 0                                                             | 39       | 28           | 67    |                      |                        |
|                           | Total    | 75                                                            | 45       | 36           | 156   |                      |                        |
| <b>Vaginal swab</b>       | Positive | 60                                                            | 1        | 1            | 62    | 100% (99.07, 100.00) | 100% (99.93, 100.00)   |
|                           | Negative | 0                                                             | 1        | 37           | 38    |                      |                        |
|                           | Total    | 60                                                            | 2        | 38           | 100   |                      |                        |
| <b>Male urine sample</b>  | Positive | 56                                                            | 0        | 1            | 57    | 100% (99.07, 100.00) | 100% (99.93, 100.00)   |
|                           | Negative | 0                                                             | 1        | 26           | 27    |                      |                        |
|                           | Total    | 56                                                            | 1        | 27           | 84    |                      |                        |
| <b>Rectal swab</b>        | Positive | 79                                                            | 1        | 3            | 83    | 100% (99.28, 100.00) | 96.66% (90.22, 100.00) |
|                           | Negative | 0                                                             | 1        | 29           | 30    |                      |                        |
|                           | Total    | 79                                                            | 2        | 32           | 113   |                      |                        |

CI, confidence interval; NG, *Neisseria gonorrhoeae*; NPA, negative percent agreement; Piv, pilin inversion; PPA, positive percent agreement

**Supplementary Table S3. Summary limit of detection estimates for cobas NG-positive samples using PivNG compared with Xpert CT/NG**

| Matrix | Assay    | LOD probit estimate<br>(CFU/mL) | 95% CI       |
|--------|----------|---------------------------------|--------------|
| Swab   | PivNG    | 0.043                           | 0.026, 0.199 |
|        | Xpert NG | 0.326                           | 0.162, 1.671 |
| Urine  | PivNG    | 0.018                           | 0.011, 0.121 |
|        | Xpert NG | 0.451                           | 0.186, 3.136 |

CFU, colony-forming unit; CI, confidence interval; LOD, limit of detection; NG, *Neisseria gonorrhoeae*; Piv, pilin inversion

**Supplementary Table S4. NPA between a specificity panel of non-gonococcal isolates and PivNG-negative results**

| Expected result | Number of non-gonococcal isolates* | PivNG (+) results | PivNG (-) results | NPA (%) | 95% exact CI |
|-----------------|------------------------------------|-------------------|-------------------|---------|--------------|
| Negative        | 20                                 | 0                 | 20                | 100     | 83.2, 100.0  |

\*Non-gonococcal *Neisseria* isolates evaluated were: *N. cinerea*, *N. dentrificans*, *N. elongata subsp. elongata*, *N. elongata subsp. niroreducans*, *N. flava*, *N. flavescens*, *N. subflava*, *N. lactamica*, *N. macacae*, *N. meningitidis Serogroup A*, *N. meningitidis Serogroup B*, *N. meningitidis Serogroup C*, *N. meningitidis Serogroup D*, *N. meningitidis Serogroup W135*, *N. meningitidis Serogroup Y*, *N. mucosa*, *N. perflava*, *N. polysaccharea*, *N. sicca* and *N. subflava*

+, positive; -, negative; CI, confidence interval; NG, *Neisseria gonorrhoeae*; NPA, negative percent agreement; Piv, pilin inversion

**Supplementary Table S5. Performance of Xpert CT/NG with Vircell control material diluted to six nominal concentrations using cobas PCR Media or molecular grade water**

| Vircell control diluted in cobas PCR Media |              |              |              |              | Vircell control diluted in molecular grade water |              |              |              |              |
|--------------------------------------------|--------------|--------------|--------------|--------------|--------------------------------------------------|--------------|--------------|--------------|--------------|
| NG<br>copies/mL                            | Xpert NG*    |              | cobas NG     | PivNG        | NG<br>copies/mL                                  | Xpert NG     |              | cobas NG     | PivNG        |
|                                            | NG2 Ct       | NG4 Ct       | NG Ct        | PivNG Ct     |                                                  | NG2 Ct       | NG4 Ct       | NG Ct        | PivNG Ct     |
| 111                                        | 32.4         | 32.7         | 34.22        | 30.4         | 111                                              | 31.9         | 31.8         | 34.14        | 30.6         |
| 111                                        | 32.5         | 32.6         | 34.28        | 30.5         | 111                                              | 31.9         | 31.5         | 33.84        | 30.5         |
| 111                                        | 32.6         | 32.2         | 33.84        | 30.3         | 111                                              | 32.3         | 32.1         | 34.75        | 30.6         |
| 36                                         | 35           | 34.8         | 36.53        | 32.2         | 36                                               | 34.6         | 33.5         | 35.67        | 32.2         |
| 36                                         | 33.9         | 34.1         | 35.92        | 31.8         | 36                                               | 34.4         | 33.7         | 36.71        | 32           |
| 36                                         | 34.4         | 33.5         | 36.02        | 32.4         | 36                                               | 35           | 34.4         | 35.27        | 32.3         |
| 8                                          | Not detected | 36.1         | 36.69        | 35           | 8                                                | 37.4         | Not detected | 39.08        | 34.3         |
| 8                                          | Not detected | 37.7         | 37.5         | 34.5         | 8                                                | 35.7         | 39.4         | 37.8         | 34.3         |
| 8                                          | 37.2         | 37.2         | 39.62        | 34.3         | 8                                                | Not detected | 37.1         | 38.28        | 35           |
| 4                                          | Not detected | 37.4         | 40.06        | 35.7         | 4                                                | 36.1         | 37.9         | 39.27        | 35.1         |
| 4                                          | 37.7         | 37.4         | 38.8         | 36.5         | 4                                                | Not detected | 37.9         | 41.67        | 35.2         |
| 4                                          | 36.7         | Not detected | 40.7         | 35.3         | 4                                                | Not detected | 35.9         | Not detected | 35.5         |
| 1                                          | Not detected | Not detected | Not detected | Not detected | 1                                                | Not detected | Not detected | 39.15        | Not detected |
| 1                                          | Not detected | Not detected | 39.83        | 35.8         | 1                                                | Not detected | Not detected | Not detected | 37.4         |
| 1                                          | Not detected | Not detected | Not detected | Not detected | 1                                                | Not detected | Not detected | Not detected | Not detected |
| 0.1                                        | Not detected | Not detected | Not detected | Not detected | 0.1                                              | Not detected | 42           | Not detected | Not detected |
| 0.1                                        | Not detected | Not detected | Not detected | Not detected | 0.1                                              | Not detected | Not detected | Not detected | Not detected |
| 0.1                                        | Not detected | Not detected | Not detected | Not detected | 0.1                                              | Not detected | Not detected | Not detected | Not detected |

\*Xpert CT/NG requires both NG targets (designated by Cepheid as NG2 and NG4) to be detected to assign a positive result

CT, *Chlamydia trachomatis*; Ct, cycle threshold; NG, *Neisseria gonorrhoeae*; Piv, pilin inversion
